# iQC: machine-learning-driven prediction of surgical procedure uncovers systematic confounds of cancer whole slide images in specific medical centers

Andrew J. Schaumberg<sup>1,a,\*</sup>, Michael S. Lewis<sup>2,3,4,b,Ⓢ</sup>, Ramin Nazarian<sup>5,6,7,Ⓢ</sup>, Ananta Wadhwa<sup>5</sup>, Nathanael Kane<sup>5,8</sup>, Graham Turner<sup>1</sup>, Purushotham Karnam<sup>1</sup>, Poornima Devineni<sup>1</sup>, Nicholas Wolfe<sup>1</sup>, Randall Kintner<sup>1</sup>, Matthew B. Rettig<sup>5,7,9,10,c</sup>, Beatrice S. Knudsen<sup>11,12,d</sup>, Isla P. Garraway<sup>5,7,13,e,Ⓢ</sup>, and Saiju Pyarajan<sup>1,f,Ⓢ</sup>

<sup>1</sup>Center for Data and Computational Sciences, VA Boston Healthcare System, Boston, MA, USA  
<sup>2</sup>Department of Pathology, VA Greater Los Angeles Medical Center, CA, USA  
<sup>3</sup>Departments of Pathology and Medicine, The Cedars-Sinai Medical Center, Los Angeles, CA, USA  
<sup>4</sup>Center for Cancer Research and Therapeutic Development, Clark Atlanta University, GA, USA  
<sup>5</sup>Veterans Affairs (VA) Greater Los Angeles (GLA) Healthcare System, Los Angeles, CA, USA  
<sup>6</sup>Department of Medical Research, VA GLA Healthcare System, Los Angeles, CA, USA  
<sup>7</sup>Department of Urology, David Geffen School of Medicine at UCLA, Los Angeles, CA, USA  
<sup>8</sup>Department of Radiation Oncology, David Geffen School of Medicine at the University of California Los Angeles (UCLA), Los Angeles, CA, USA  
<sup>9</sup>Department of Medicine, Division of Hematology-Oncology, VA GLA, Los Angeles, CA, USA  
<sup>10</sup>Department of Medicine, David Geffen School of Medicine at UCLA, Los Angeles, CA, USA  
<sup>11</sup>Huntsman Cancer Institute BMP Core, University of Utah, Salt Lake City, Utah 84108, USA  
<sup>12</sup>Department of Pathology, University of Utah, Salt Lake City, Utah 84108, USA  
<sup>13</sup>UCLA Jonsson Comprehensive Cancer Center, Los Angeles, CA, USA  
<sup>a</sup>AJS <https://orcid.org/0000-0001-7556-9208>  
<sup>b</sup>MSL <https://orcid.org/0000-0002-1892-4127>  
<sup>c</sup>MBR <https://orcid.org/0000-0002-7394-3056>  
<sup>d</sup>BSK <https://orcid.org/0000-0002-7589-7591>  
<sup>e</sup>IPG <https://orcid.org/0000-0002-1129-4636>  
<sup>f</sup>SP <https://orcid.org/0000-0002-9047-3762>  
<sup>Ⓢ</sup>One or more supervision-related contributions.  
\*Correspondence: [andrew.schaumberg@va.gov](mailto:andrew.schaumberg@va.gov) or [ajs625@cornell.edu](mailto:ajs625@cornell.edu)

September 19, 2023

## Abstract

**Problem:** The past decades have yielded an explosion of research using artificial intelligence for cancer detection and diagnosis in the field of computational pathology. Yet, an often unspoken assumption of this research is that a glass microscopy slide faithfully represents the underlying disease. Here we show systematic failure modes may dominate the slides digitized from a given medical center, such that neither the whole slide images nor the glass slides are suitable for rendering a diagnosis.

**Methods:** We quantitatively define high quality data as a set of whole slide images where the type of surgery the patient received may be accurately predicted by an automated system such as ours, called “iQC”. We find iQC accurately distinguished biopsies from nonbiopsies, e.g. prostatectomies or transurethral resections (TURPs, a.k.a. prostate chips), only when the data qualitatively appeared to be high quality, e.g. vibrant histopathology stains and minimal artifacts. Crucially, prostate needle biopsies appear as thin strands of tissue, whereas prostatectomies and TURPs appear as larger rectangular blocks of tissue. Therefore, when the data are of high quality, iQC (i) accurately classifies pixels as tissue, (ii) accurately generates statistics that describe the distribution of tissue in a slide, and (iii) accurately predicts surgical procedure.

We additionally compare our “iQC” to “HistoQC”, both in terms of how many slides are excluded and how much tissue is identified in the slides.

**Results:** While we do not control any medical center's protocols for making or storing slides, we developed the iQC tool to hold all medical centers and datasets to the same objective standard of quality. We validate this standard across five Veterans Affairs Medical Centers (VAMCs) and the Automated Gleason Grading Challenge (AGGC) 2022 public dataset. For our surgical procedure prediction task, we report an Area Under Receiver Operating Characteristic (AUROC) of 0.9966-1.000 at the VAMCs that consistently produce high quality data and AUROC of 0.9824 for the AGGC dataset. In contrast, we report an AUROC of 0.7115 at the VAMC that consistently produced poor quality data. An attending pathologist determined poor data quality was likely driven by faded histopathology stains and protocol differences among VAMCs. Corroborating this, iQC's novel stain strength statistic finds this institution has significantly weaker stains ( $p < 2.2 \times 10^{-16}$ , two-tailed Wilcoxon rank-sum test) than the VAMC that contributed the most slides, and this stain strength difference is a large effect (Cohen's  $d = 1.208$ ).

In addition to accurately detecting the distribution of tissue in slides, we find iQC recommends only 2 of 3736 VAMC slides (0.005%) be reviewed for inadequate tissue. With its default configuration file, HistoQC excluded 89.9% of VAMC slides because tissue was not detected in these slides. With our customized configuration file for HistoQC, we reduced this to 16.7% of VAMC slides.

**Conclusion:** Our surgical procedure prediction AUROC may be a quantitative indicator positively associated with high data quality at a medical center or for a specific dataset. We find iQC accurately identifies tissue in slides and excludes few slides, unless the data are poor quality. To produce high quality data, we recommend producing slides using robotics or other forms of automation whenever possible. We recommend scanning slides digitally before the glass slide has time to develop signs of age, e.g faded stains and acrylamide bubbles. We recommend using high-quality reagents to stain and mount slides, which may slow aging. We recommend protecting stored slides from ultraviolet light, from humidity, and from changes in temperature. To our knowledge, iQC is the first automated system in computational pathology that validates data quality against objective evidence, e.g. surgical procedure data available in the EHR or LIMS, which requires zero efforts or annotations from anatomic pathologists.

## 1 Introduction

Over the past several years in the field of computational pathology[1], automated methods to assess data quality have tended to focus on excluding confounded regions or measuring the negative impact of poor quality data. The field has benefited from specialized tools such as tissue fold detection[2], blur detection[3], pen detection[4], and fragment detection[5] – as well as general frameworks for quality control[6, 7]. The negative effect of whole slide image artifacts on downstream computational pathology methods has been benchmarked[8, 9], with some reports of specific normalizations improving task performance under specific artifacts[10, 11].

If an automated system is not used to segment out artifacts or other confounds that would lower data quality, computational pathology pipelines may implicitly or explicitly have methods to exclude artifacts. For instance, our earlier work to predict SPOP mutation in prostate cancer was engineered to focus on diagnostically salient regions enriched in predicted subtypes of nuclei, which implicitly avoids pen and background[12]. Later, in what would form the basis of Paige Prostate, Campanella and colleagues used weakly supervised learning and a recurrent neural network to identify suspect foci of cancer in whole slide images, which explicitly used Otsu's method[13] to exclude background and through machine learning at scale may implicitly learn to avoid some artifacts[14]. Shortly thereafter, Lu and colleagues used weakly supervised learning with an attention mechanism for renal cancer subtyping, which explicitly used thresholding to exclude background, while their

attention mechanism was shown to exclude normal morphology and some artifacts[15].

102

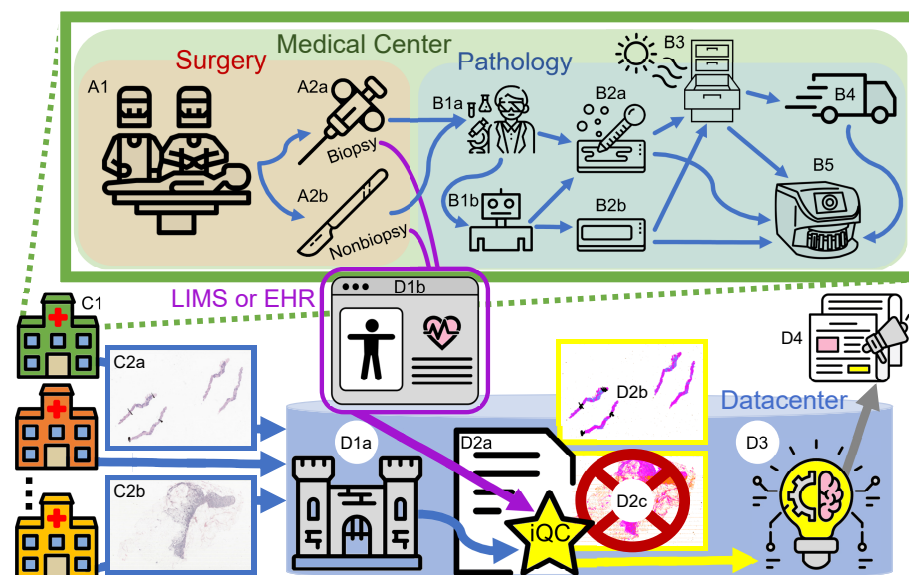

**Fig 1.** Our study’s workflow (Sec S1.9), from a patient’s surgery (A1), through iQC’s quality control (D2a-c), to downstream computational research (D3) and results (D4). **A1:** Tissue is surgically excised from the patient. **A2a:** Tissue may be excised as a needle biopsy, which removes a thin ribbon of tissue (Fig 2A1). **A2b:** Alternatively, tissue may be excised as a “nonbiopsy”, e.g. a prostatectomy (Fig 2E1) or a transurethral resection of prostate (TURP). **B1a:** A pathologists’ assistant receives the tissue. **B2b:** The pathologists’ assistant may use a machine to prepare the slide. **B2a:** A slide may be prepared by hand or by machine, using stains and *mounting solution*. **B2b:** Alternatively, a machine may prepare the slide using stains and a lower-cost *mounting tape*. **B3:** A prepared slide is stored, e.g. in a cabinet in the pathology department or medical center. Slides age here and may be subject to changes in heat, humidity, ultraviolet light, etc. Aging rates may depend on slide preparation. **B4:** If the pathology department does not have a whole slide scanner, the department ships the slides to a different medical center that has one. **B5:** A whole slide scanner takes a high-resolution picture of the entire slide. This picture is a whole slide image. **C1:** Several medical centers in parallel generate whole slide images. **C2a:** Each medical center sends a mix of whole slide images, which may include biopsies (c.f. A2a). **C2b:** Nonbiopsy images may be sent in the mix (c.f. A2b). **D1a:** Images are collected and organized in the datacenter. **D1b:** The Laboratory Information Management System (LIMS) tracks which slides are biopsies (e.g. C2a) and which slides are nonbiopsies (e.g. C2b). These biopsy/nonbiopsy metadata are used to train iQC (D2a) to predict from the image the corresponding surgical procedure (biopsy vs nonbiopsy). Alternatively, surgical procedure may be tracked in the Electronic Health Record (EHR). **D2a:** iQC subjects all whole slide images to quality control and generates many statistics to describe each image. **D2b:** iQC generates a mask image to describe each pixel (c.f. C2a), and in this case passes biopsy samples on to downstream studies (D3). **D2c:** iQC may reject poor quality slides or withhold nonbiopsies (c.f. C2b) from downstream studies (D3), if the studies are intended to be of biopsies only. **D3:** Downstream computational studies may occur on high-quality whole slide images of the appropriate surgical procedure type, i.e. biopsies. **D4:** Studies may lead to publication.

Unfortunately, in a large independent validation, Perincheri and colleagues noted “Areas for improvement were identified in Paige Prostate’s handling of poor quality scans”, which may suggest weakly supervised learning may benefit from rigorous quality control as a preprocessing step[16]. Quality control may flag poor quality slides for manual review, exclude artifacts, or take other actions before Paige Prostate or other downstream processing occurs.

Inspired by our early work that noted different surgical procedures (Fig 1A2,A3) may impact the distribution of tissue in a slide and deep learning performance[17], we developed

103  
104  
105  
106  
107  
108  
109  
110

the hypothesis underlying our iQC tool. Specifically, for high quality data, a quality control system should be able to accurately count the number of tissue pixels in a slide, describe the distribution of tissue in a slide, and therefore predict what kind of surgical procedure was used to excise the tissue present in the slide (Fig 2A1,C1,D1,F1,Q1 are biopsy examples versus Fig 2B1,L2,N1,O1,P1 are nonbiopsy examples). Thus for poor quality data, our hypothesis is that tissue may not be accurately measured and surgical procedure may not be accurately predicted.

111  
112  
113  
114  
115  
116  
117

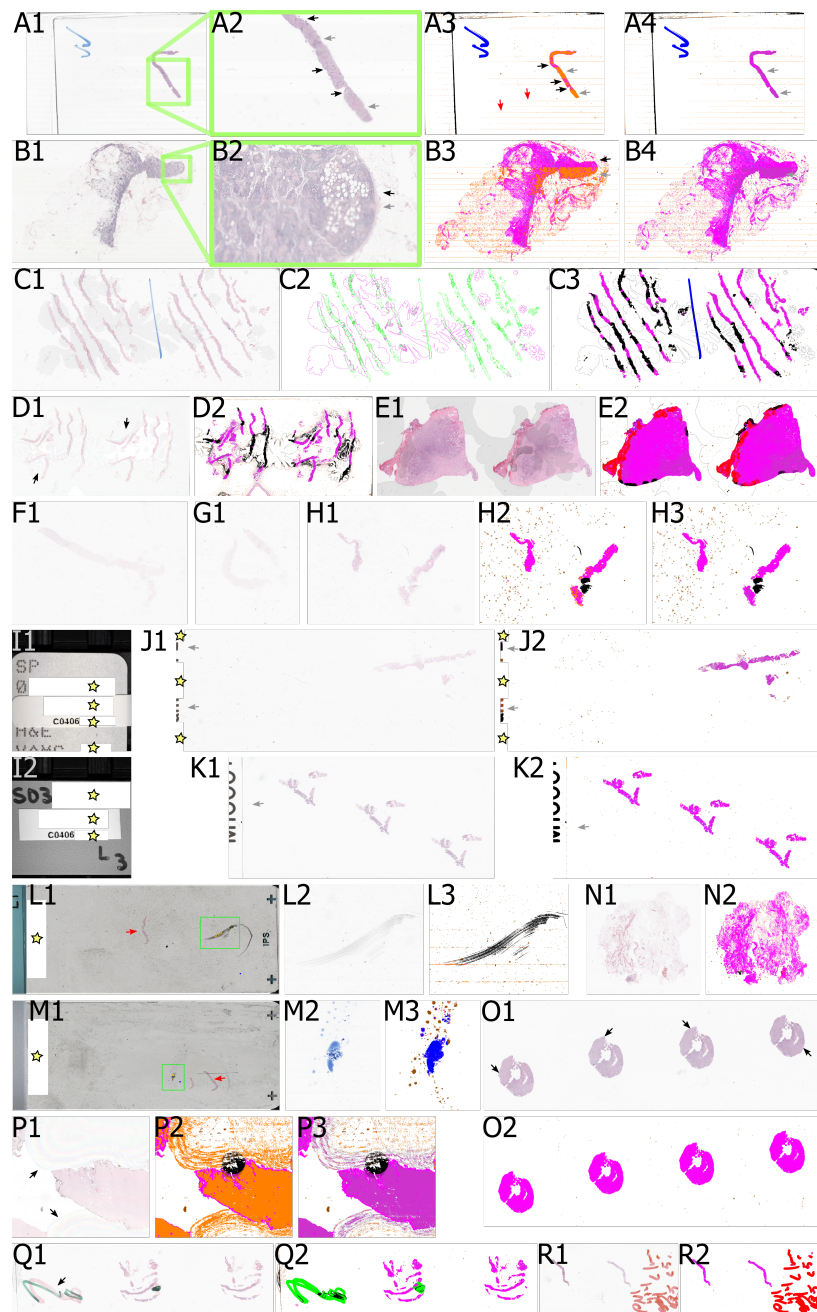

118  
119



**Fig 2.** Representative histopathology images in our study. **A1:** a whole slide image of a prostate needle biopsy at low magnification. **A2:** High magnification of prostate needle biopsy from A1, showing horizontal bands of systematic blur (gray arrows), in contrast to bands of visually sharp pixels where glands are visible (black arrows). **A3:** iQC's quality control mask ( $i_{mask_{raw}}$ ) showing the type of each pixel – background pixels are in white, blue pen pixels (which draw two blue check marks rotated 90°) are in blue, the edge of the slide is in black, tissue pixels are in magenta (black arrows), “suspect” tissue pixels are orange (gray arrows), and “suspect” pixels that form horizontal bands (red arrows) may suggest the quality of this whole slide image suffers from systematic blur. **A4:** iQC's quality control mask ( $i_{mask_{inferred}}$ ) shows machine learning infers “suspect” tissue pixels as tissue (dark magenta at gray arrows), so all tissue in the slide may be accurately measured for biopsy/nonbiopsy prediction. **B1:** A pelvic lymph node at low magnification where systematic blur may be difficult to perceive. **B2:** Higher magnification plainly shows a horizontal band of systematic blur (gray arrow) compared to visually sharp pixels (black arrow). **B3:** This  $i_{mask_{raw}}$  shows sharp pixels are assigned the “tissue” type as indicated in magenta (black arrow), while systematically blurred pixels have the “suspect” type as indicated in orange (gray arrow). **B4:** Machine learning infers “suspect” tissue pixels as tissue, which is shown as a dark magenta (gray arrow). **C1:** A prostate needle biopsy, where the slide shows signs of age. **C2:** iQC's quality control mask  $i_{mask_{edge}}$  outlines in magenta these signs of age, i.e. large acrylamide bubbles from degraded mounting compound incompletely holding the coverslip to the glass slide (Sec S1.6). Tissue and pen are outlined in green. **C3:**  $i_{mask_{inferred}}$  shows some tissue pixels in magenta, while other tissue pixels are shown in black, which may loosely correspond to which tissue is most confounded by bubbles. Bubble edges are shown in black. **D1:** This slide shows signs of age through refractive dispersion that causes a rainbow effect (black arrows), in addition to bubbles. **D2:** Like C3,  $i_{mask_{inferred}}$  shows tissue in magenta and the most age-confounded pixels in black. **E1:** The Cancer Genome Atlas (TCGA) is a public dataset. There are bubbles throughout slide TCGA-QU-A6IM-01Z, which may emphasize the value of automated quality control for public datasets. **E2:**  $i_{mask_{inferred}}$  shows bubble edges or bubble-confounded regions in black, regions with blood/erythrocytes in red, and regions with blue marker in blue. **F1,G1,H1:** all these slides have faded histopathology stains. A pathologist deemed these slides unsuitable for diagnosis, corroborating iQC's stain strength statistics (Sec S1.2.7.1) that are weak for these slides. **H2,H3:**  $i_{mask_{raw}}$  and  $i_{mask_{inferred}}$ , respectively, which show points of debris as brown spots, threads of debris in black, and thread-confounded tissue in black. **I1:** A whole slide image thumbnail showing identifiers such as surgical pathology number “SP...” that may be printed on the glass slide, along with other identifiers. A coded external ID “C...” may be applied as a sticker on top to redact some or all of these identifiers. We indicate our redactions to this image with stars. **I2:** A whole slide image thumbnail that shows an accession number “S03...” and a coded external ID “C...”. We remove all thumbnails from slides because no identifiers are allowed in research data. Our redactions are indicated with stars. **J1,J2,K1,K2:** Depending on how the glass slide is physically aligned during scanning, text or potentially identifiers on the slide (see I1,I2) may be scanned in the whole slide image at high resolution (at gray arrows, stars for redactions). iQC flags for manual review slides having such markings because patient names or other identifiers are not allowed in research data. **L1:** The thumbnail indicates a black scuff artifact was scanned at high resolution (green box) – missing the prostate needle biopsy (red arrow). **L2,L3:** There is no human tissue scanned at high resolution in this slide, only the black artifact. **M1:** The thumbnail indicates a blue pen mark was scanned at high resolution (green box) – missing the prostate needle biopsy (red arrow). **M2,M3:** There is no human tissue scanned at high resolution in this slide, only the blue artifact. **N1,N2:** Iliac bone in our dataset, due to metastasis. **O1,O2:** Colon polypectomy in our dataset, with colonic crypts visible (black arrows). **P1:** Slide with faded stain and more extensive refractive dispersion (black arrows) than D1. **P2:** Due to faded stain and slide age, many pixels have the “suspect” type in  $i_{mask_{raw}}$  (orange). **P3:** Underlining the importance of iQC's machine learning to infer pixel types, these pixels are re-typed as tissue (dark magenta) in  $i_{mask_{inferred}}$ . Other suspect pixels are inferred as background (gray). **Q1,Q2:** Green pen over red pen (black arrow) typed as green or black in  $i_{mask_{inferred}}$ . **R1,R2:** iQC detects red pen.

## 2 Results

### 2.1 Batch effect of poor data quality detected

We found a batch effect, where a subset of data accounted for most slides in iQC's "fail\_all\_tissue" category (Fig 3A1). iQC defines ten quality control categories (Sec S1.1). Specifically, we found Institution  $\beta$  accounted for most of the "fail\_all\_tissue" slides (Fig 3A2). An anatomic pathologist recommended all slides from Institution  $\beta$  fail quality control and be remade (Fig 3B2).

#### 2.1.1 HistoQC recapitulates iQC batch effect identification

With HistoQC, we could recapitulate this result and find the batch effect. While the default configuration file for HistoQC (Sec S1.5) excluded most slides as "no\_tissue\_detected" (Fig 3A3), we could customize the HistoQC configuration file. With our custom configuration file, HistoQC correctly identified most slides that failed as "no\_tissue\_detected" were from Institution  $\beta$  (Fig 3A4).

While iQC and HistoQC agree on the batch effect, their methods to exclude slides differ (Fig 4). iQC directly detects faded histopathology stains (Sec S1.2.7.1), and marks these slides as "fail\_all\_tissue". In contrast, HistoQC may not detect tissue having faded stains, in which case these slides are marked as "no\_tissue\_detected".

#### 2.1.2 iQC surgical prediction performance corresponds to data quality

After manually reviewing dozens of cases in detail from Institution  $\alpha$ , we determined the equations and parameters for iQC's surgical procedure (i.e. biopsy/nonbiopsy) predictor (Sec S1.4). In this way, iQC achieved AUROC of 0.9966 for the biopsy/nonbiopsy prediction task (Fig 5A). Testing this on all other VAMC data, we found AUROC substantially dropped to AUROC of 0.8346 (Fig 5B). Testing only on Institution  $\beta$  data, we found even lower AUROC of 0.7115 (Fig 5C). Testing on the Institutions that were neither  $\alpha$  nor  $\beta$ , we found AUROC of 1.000 (Fig 5D). We concluded Institution  $\beta$  drove the drop in AUROC on non-Institution- $\alpha$  data (Fig 5B).

### 2.2 iQC standard of data quality across datasets

We next asked if iQC would serve as a standard of quality both on VAMC data and unseen high quality data from outside Veterans Affairs. In the public dataset for the Automated Gleason Grading Challenge 2022[18], we found zero slides failed iQC's quality control, using the same quality control code, configuration, and thresholds for iQC at VAMCs (Fig 3A5). This may suggest iQC may serve as a standard of data quality across datasets without reconfiguration, but we sought corroborating evidence, below.

#### 2.2.1 iQC surgical prediction performance strong on external high quality datasets

To test how well iQC generalized to unseen data, and more specifically to non-Veteran data, we evaluated iQC's biopsy/nonbiopsy predictor on AGGC data[18]. We found an AUROC of 0.9824 (Fig 5E). This may suggest iQC generalizes well to unseen data, external datasets, and non-Veteran data. An example of a nonbiopsy that iQC mistakes for a biopsy is shown in Figure 5F1, where the ectomy tissue is cut into a long a thin strip. Biopsies tend to be long and thin.

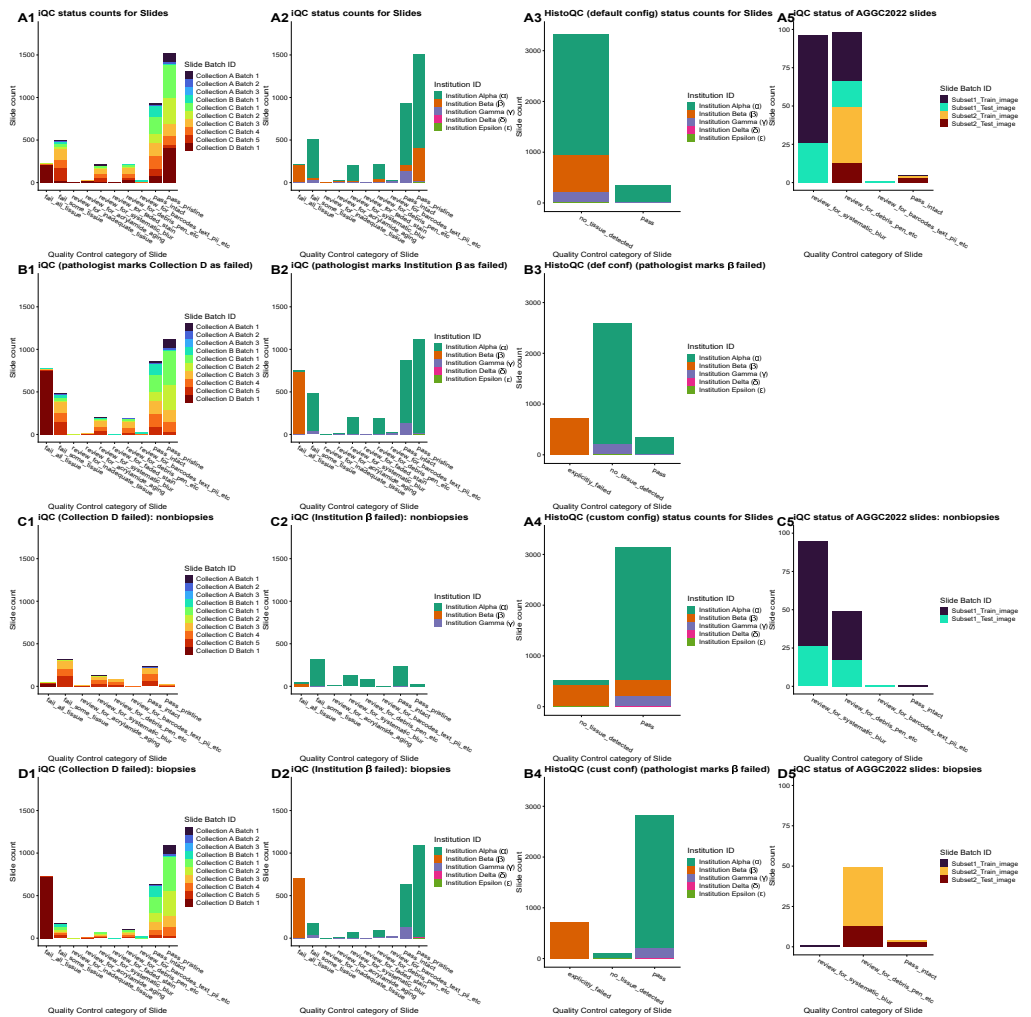

**Fig 3.** iQC and HistoQC quality control category counts for slides in our study. **A1:** Initial data collection. A “collection” is a set of data, e.g. all slides from a conference room or a prior study. A “batch” corresponds to a subset of slides, e.g. the first box of slides from the conference room. The next box is batch 2. We noticed “Collection D Batch 1” accounted for most slides in iQC’s “fail\_all\_tissue” category (red arrow), which indicates these slides have faded stain, so the entire slide is unsuitable for diagnosis. **A2:** Coloring A1 according to the VAMC/Institution that made the slide, it appears Institution Beta ( $\beta$ ) accounts for most “fail\_all\_tissue” slides, which is a batch effect. iQC fails 227 slides as “fail\_all\_tissue”, 505 slides as “fail\_some\_tissue”. **A3:** With the default configuration file, HistoQC fails (89.9%) of slides as “no\_tissue\_detected”. For comparison, iQC only marks 2 slides as “review\_for\_inadequate\_tissue” (panel A2). **A4:** With our customized configuration file, HistoQC fails (16.7%) of slides as “no\_tissue\_detected”, which is much better than the default configuration’s 89.9% (panel A3). For comparison, iQC only marks 227 slides (6.2%) as “fail\_all\_tissue” (panel A2). **A5:** Zero AGGC slides fail iQC’s quality control, suggesting this dataset is high quality[18]. Most slides are “review...”, which is a warning. Many slides have tissue debris. **B1,B2:** A pathologist reviewed slides from Institution  $\beta$ . He concluded they were poor quality and unsuitable for diagnosis. He recommended all slides from Institution  $\beta$  fail quality control (red arrow). **B3,B4:** HistoQC’s corresponding failure status for Institution  $\beta$  slides is “explicitly\_failed”. **C1,C2,C5:** Quality control categories for slides iQC predicted to be nonbiopsies, e.g. prostatectomies or TURPs. **D1,D2,D5:** Quality control categories for slides iQC predicted to be biopsies of any sort, e.g. prostate needle biopsies or liver biopsies. For us, HistoQC did not accept the AGGC TIFF file format of whole slide images (Sec S1.5).

## 2.3 iQC's stain strength statistic quantifies differences among VAMCs and datasets

To test if iQC could quantify differences in stain strength among VAMCs, among surgical procedures, and between VAMC and non-VAMC datasets, we considered iQC's novel stain strength statistic for each whole slide image (Sec S1.2.7.1).

### 2.3.1 Significant and large stain strength difference among VAMC biopsies

We found VAMC Institution  $\alpha$  contributed biopsy slides that were stained significantly stronger than VAMC Institution  $\beta$ 's biopsy slides ( $p < 2.2 \times 10^{-16}$ , two-tailed Wilcoxon rank-sum test), and this staining effect was large (Cohen's  $d = 1.208$ ) (Fig 6). Corroborating our pathologist's expert opinion that  $\beta$  slides were faded such that  $\beta$  slides were unsuitable for diagnosis (Fig 2F1,G1,H1), we suspect this large effect as measured by Cohen's D is clinically meaningful.

### 2.3.2 Negative control: differences in stain strength between biopsies and nonbiopsies at a VAMC unlikely to be clinically meaningful

We found VAMC Institution  $\alpha$  biopsy slides were stained significantly stronger than  $\alpha$  nonbiopsy slides ( $p = 5.823 \times 10^{-14}$ ), but this effect was so small ( $d = 0.390$ ) that we believe this difference is probably not clinically meaningful (Fig 6).

### 2.3.3 Negative control: no differences in stain strength in AGGC biopsies vs nonbiopsies

We found AGGC biopsies and nonbiopsies have stain strength differences that may be due to change alone ( $p = 0.7991$ ), and the overall effect size of stain strength differences was negligible ( $d = 0.0976$ ) (Fig 6). We believe this is an important negative control for iQC's stain strength statistic, which is particularly valuable because AGGC is a public dataset.

### 2.3.4 Positive control: large differences in stain strength between VAMCs and AGGC dataset

Highlighting potential differences in slide staining protocols, whole slide scanners, etc – we found AGGC biopsies were stained significantly stronger than VAMC Institution  $\alpha$  biopsies ( $p < 2.2 \times 10^{-16}$ ), and this effect was large indeed ( $d = 8.223$ ) (Fig 6). We are encouraged that despite these large differences between VAMC and AGGC datasets, iQC could still accurately distinguish biopsies from nonbiopsies for both VAMC and AGGC datasets (Fig 5), which may be evidence that iQC's methods will generalize well to yet other high-quality non-VAMC datasets.

## 3 Methods

This study was approved by the Institutional Review Board at the VA Boston Healthcare System.

Institutions  $\alpha$  and  $\gamma$  prepare slides with a special Toluene-based mounting media (Fig 1B2a) that is resistant to oxidation, discoloration, and fading (Sec S1.6). This may contribute to the quality of slides from Institutions  $\alpha$  and  $\gamma$ . We suspect Institution  $\beta$  used mounting tape (Fig 1B2b) to prepare many or all of their slides.

iQC generates interpretable statistics to calculate a score for biopsy/nonbiopsy prediction. iQC has a multistep pipeline, including (1) Otsu thresholds (Sec S1.2.1), (2) preliminary pixel typing (Sec S1.2.2), (3) debris detection (Sec S1.2.3), (4) edge detection (Sec S1.2.4), (5) blur artifact detection (Sec S1.2.5), (6) black mark detection (Sec S1.2.6), (7) pen detection, connection, and extension (Sec S1.2.7), (8) stain strength calculations (Sec S1.2.7.1), (9) write  $i_{mask_{raw}}$  mask

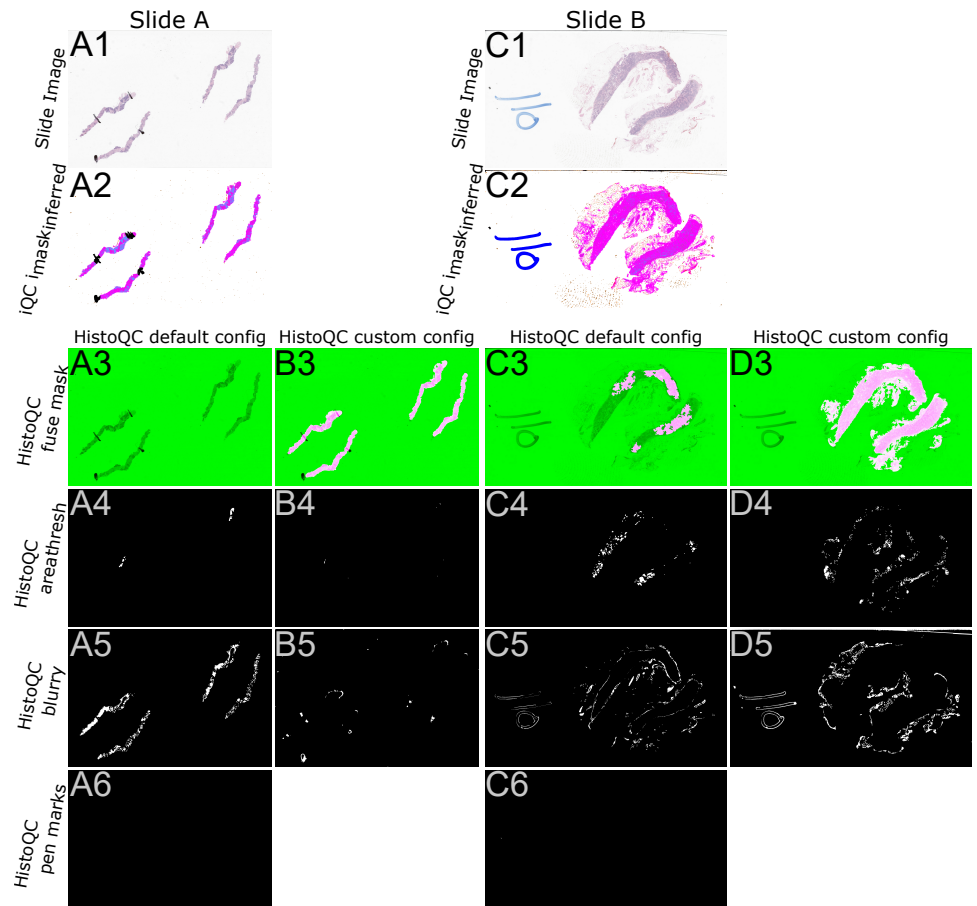

**Fig 4.** Qualitative comparison of iQC to HistoQC. **A1:** A prostate needle biopsy. **A2:** iQC's  $i_{mask_{inferred}}$  segments slide background (white), tissue (magenta), tissue with rich hematoxylin staining (cyan), black pen marks (black), and debris (brown). **A3:** HistoQC excludes the entire slide, per the “fuse” mask (green). **A4:** HistoQC excludes some areas for small area. **A5:** HistoQC excludes most areas as blurry. **A6:** HistoQC does not exclude any areas as pen marks. **B3:** With our custom configuration file, HistoQC segments out the tissue in the slide (pink, c.f. panel A3). We disabled pen detection in this configuration. **B4:** As expected, no small areas were excluded. **B5:** Few regions were discarded as blurry, which is better than the default configuration (panel A5). **C1:** Adipose tissue indicates this is not a biopsy (Eqn 1). **C2:** iQC's  $i_{mask_{inferred}}$  segments background, tissue, blue pen, and debris. **C3:** HistoQC includes some tissue (magenta) and excludes the rest (green). **C4:** HistoQC excludes some tissue as small areas. **C5:** HistoQC excludes some tissue and pen as blurry. **C6:** HistoQC does not exclude any areas as pen marks. **D3:** With our custom configuration file, HistoQC segments out most of the tissue (pink) but excludes some adipose tissue that iQC detects (panel C2 in magenta). **D4:** HistoQC still excludes some small areas unfortunately. **D5:** HistoQC excludes more regions as blurry, which is worse than the default configuration (panel C5).

(Sec S1.2.8), (10) blur artifact orientation detection (Sec S1.2.9), (11) writing of  $i_{mask_{mean}}$  that mixes base image with  $i_{mask_{raw}}$  (Sec S1.2.10), (12) machine-learning-driven inference of “suspect” type pixels to other types e.g. pen, tissue, and background (Sec S1.2.11), (13) write  $i_{mask_{inferred}}$  mask (Sec S1.2.12), (14) biopsy/nonbiopsy prediction (Sec S1.2.13), (15) ridge detection and age-related bubble detection (Sec S1.2.14), (16) write  $i_{mask_{edge}}$  mask (Sec S1.2.15), (17) barcode and text detection for PHI/PII risks (Sec S1.2.16), and (18) close-out timing statistics (Sec S1.2.17).

iQC's biopsy/nonbiopsy predictor is a function that generates a score ( $y(i_{m_i})$  in Eqn 1) between



0 and 1000000, with low numbers favoring a biopsy and high numbers favoring a nonbiopsy, e.g. prostatectomy or TURP, where for brevity we denote  $i_{mask_{inferred}}$  as  $i_{m_i}$ : 211  
212

$$y(i_{m_i}) = \min(1000000, G_{narrow}(i_{m_i}) \times G_{area}(i_{m_i}) \times G_{long}(i_{m_i}) + G_{adipose}(i_{m_i})) \quad (1)$$

Each  $G(\dots)$  is a Gompertz function[19], further discussed in the supplement (Sec S1.4). 213  
Computational software and hardware (Sec S1.5), as well as whole slide image details 214  
(Sec S1.7), are detailed in the supplement. 215

## 4 Discussion 216

### 4.1 Data quality defined on objective ground truth 217

To our knowledge, we are the first to define quality in terms of objective ground truth data, 218  
e.g. a dataset is high quality if the AUROC is close to 1.0 for a surgical procedure prediction 219  
task. Surgical procedure data are available from a Laboratory Information Management 220  
System (LIMS). For iQC, AUROC is close to 1.0 for all datasets and VAMCs except 221  
Institution  $\beta$ . Institution  $\beta$  has AUROC of 0.71 and poor quality data. 222

#### 4.1.1 Objective ground truth from LIMS or EHR is scalable 223

We believe iQC is a novel approach to quality control because it is rooted in objective 224  
ground truth. Highly curated surgical procedure or other coded data from the LIMS or 225  
Electronic Health Record (EHR) are readily available. This approach may scale well because 226  
surgical procedure annotations are at the whole slide level, rather than at the region of 227  
interest (ROI) or pixel level. Slide-level annotations drive the scalability of Campanella[14], 228  
Lu[15], and other weakly supervised learning pipelines. Still, iQC provides quality control 229  
masks for per-pixel semantic segmentation, e.g.  $i_{mask_{inferred}}$ , to assist pathologists and 230  
downstream AI pipelines in distinguishing artifacts such as pen or blur from tissue in the 231  
whole slide image. 232

#### 4.1.2 Prior work in defining quality 233

iQC's definition of quality in terms of objective ground truth data differs from some prior 234  
approaches to quality control in digital pathology. In 2019, Schaumberg and Fuchs defined 235  
quality control in terms of numeric parameters or rules that were hand-engineered[7]. To 236  
refine the subjective nature of quality control, HistoQC validated quality control in terms of 237  
pathologist concordance[20]. A follow-up HistoQC study of the Nephrotic Syndrome Study 238  
Network (NEPTUNE) digital pathology repository disqualified 9% of slides as unsuitable for 239  
analysis, where slides were disqualified if particular statistics were out of pre-programmed 240  
bounds, such as the mean brightness of the entire slide being too high or low[21]. HistoROI 241  
claimed to improve upon HistoQC through human-in-the-loop training and a deep learning 242  
system on annotated tiles, although this quality control depends on manual annotations 243  
from pathologists and their subjective interpretation of the morphology, which may be 244  
challenging to independently reproduce exactly[22]. 245

### 4.2 Myriad technical factors drive quality 246

Institution  $\beta$  slides were made in the years 2000-2007. The slides were over a decade old 247  
when they were scanned in 2023 (Sec S1.7). The slides from the other VAMCs were made 248  
in the years 2003-2021. We believe this suggests there are myriad technical factors beyond 249  
calendar age that contribute to how over time slides show signs of age, e.g. faded stain 250  
(Sec S1.2.7.1) and acrylamide bubbles (Sec S1.2.14). Technical factors may include the 251  
formulation of hematoxylin and eosin (H&E) stains, the slide mounting protocol (e.g. 252

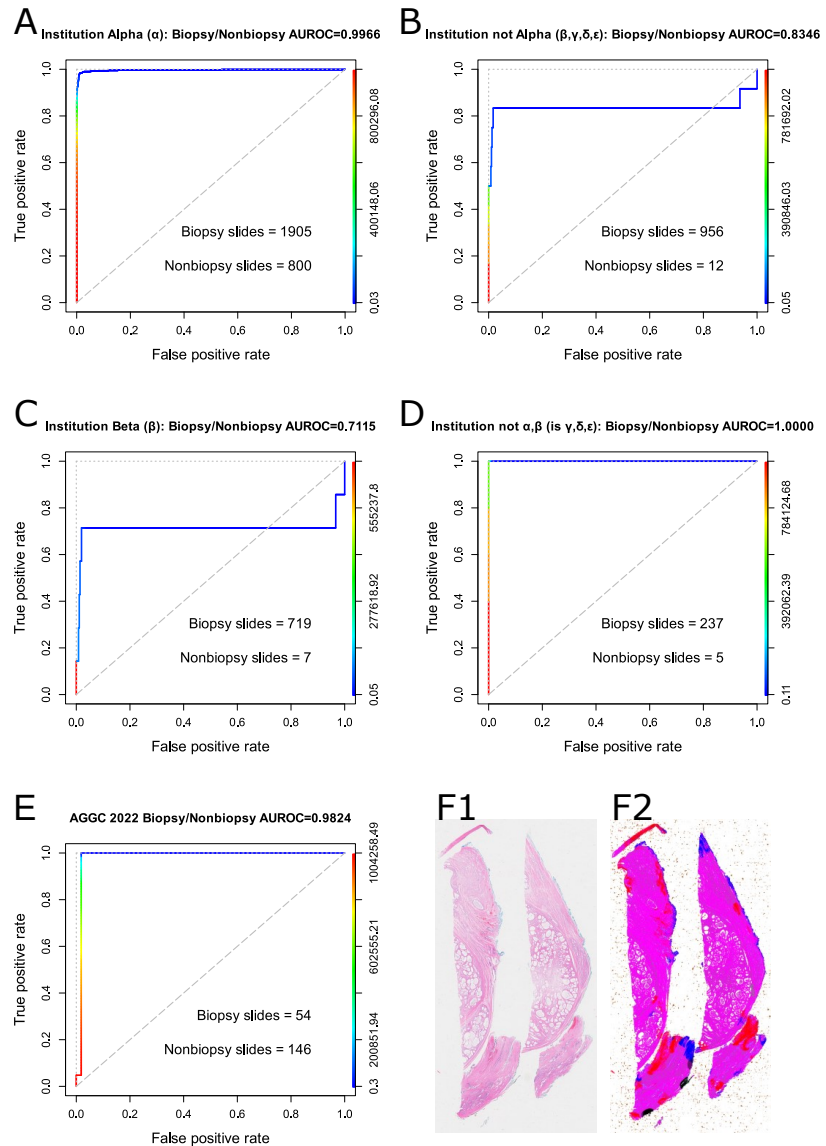

**Fig 5.** iQC biopsy/nonbiopsy prediction AUROC for various datasets and subsets in our study. **A:** AUROC for Institution Alpha ( $\alpha$ ), which made most VAMC slides. We trained/tuned biopsy/nonbiopsy predictor on a subset of this dataset, so AUROC is high. **B:** AUROC for all institutions that are not  $\alpha$ , i.e.  $\beta, \gamma, \delta, \epsilon$ . AUROC is much lower. There are few nonbiopsy slides. **C:** AUROC for  $\beta$ , which is strikingly low. We believe this is because Institution  $\beta$  provided poor quality slides that were old and had faded stain. iQC is not able to accurately identify which pixels are tissue and cannot distinguish biopsies from nonbiopsies. **D:** AUROC for other VAMCs (i.e.  $\gamma, \delta, \epsilon$ ) is high but this is an underpowered test because there are only 5 nonbiopsies. **E:** AUROC on the public AGGC dataset[18] is high, indicating iQC's biopsy/nonbiopsy predictor may generalize well to unseen data. **F1, F2:** iQC mistakenly classified this prostatectomy sample as a needle biopsy, perhaps because the distribution of tissue is long and thin, very loosely like a needle biopsy.

Fig 1B2a mounting solution vs Fig 1B2b mounting tape), and storage conditions of the slides. Storage conditions may vary in terms of temperature, humidity, or ultraviolet light exposure. Institution  $\alpha$ 's protocols may have mitigated some of these technical factors to maintain high quality (Sec S1.6).

253  
 254  
 255  
 256

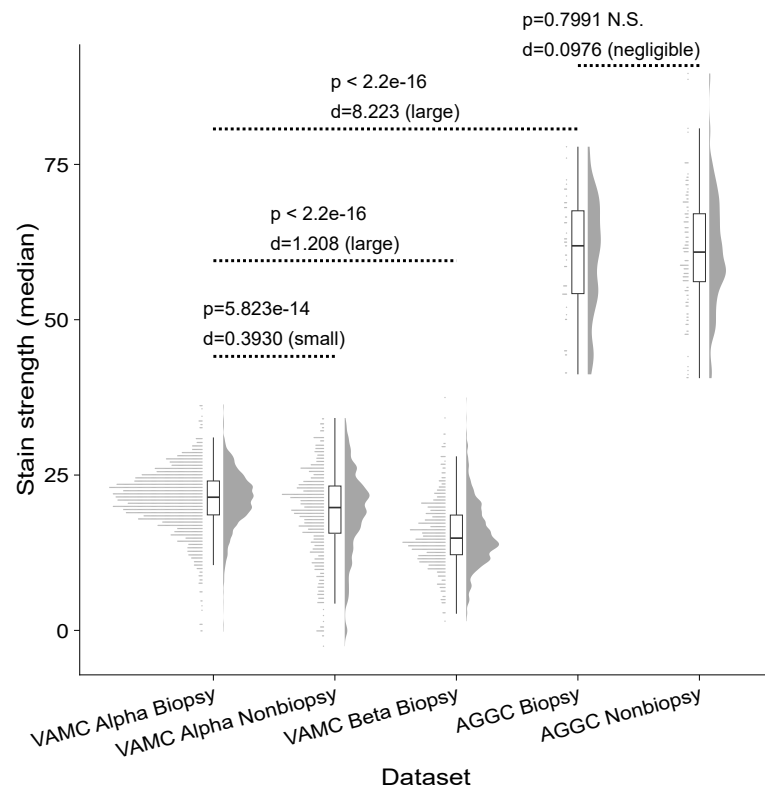

**Fig 6.** iQC stain strength quantifies differences among VAMCs, datasets, and surgical procedures. For the AGGC dataset (*top right*), there is not a significant difference ( $p = 0.7991$ , two-tailed Wilcoxon rank-sum test) between biopsy and nonbiopsy stain strength, which is a negative control for us. For Institution Alpha (*at left*), there is a statistically significant ( $p = 5.823 \times 10^{-14}$ ) but small difference (Cohen's  $d = 0.3930$ ) in stain strength, when comparing biopsies to nonbiopsies, but we do not believe such a small difference is clinically meaningful. When comparing biopsies from Institution Alpha to Institution Beta (*at center*), we find the stain strength differences are both significant ( $p < 2.2 \times 10^{-16}$ ) and large ( $d = 1.208$ ), supporting our qualitative finding that Institution Beta slides have faded stains. There is an even larger stain strength difference ( $d = 8.223$ ,  $p < 2.2 \times 10^{-16}$ ) between AGGC biopsies and Institution Alpha biopsies, which may be attributed to differences in staining protocols and whole slide scanners.

### 4.3 Pathologist review essential for assessing quality, taking action 257

iQC detected the faded stain and assigned many Institution  $\beta$  slides to the “fail\_all\_slide” 258  
 quality control category to indicate these slides are not suitable for diagnosis (Fig 3A2). An 259  
 anatomic pathologist later reviewed the slides and recommended all Institution  $\beta$  slides fail 260  
 quality control and be remade (Fig 3B2). iQC's stain strength statistic recapitulated the 261  
 pathologist's finding of faded stains at Institution  $\beta$  (Fig 6). 262

### 4.4 Quality control machine learning framed as search 263

Proceeding from some of our earlier work that showed how tractable search is in 264  
 computational pathology[23, 24], we framed quality control as a search problem at the pixel 265  
 level. Rather than train artifact-specific classifiers to detect blur[3], pen[4], or coverslip 266  
 breaks[6], iQC uses machine learning to compute how similar a “suspect” pixel is to other 267  
 “nonsuspect” pixel types (e.g. pen, tissue, background, etc see Section S1.8). We believe 268  
 this allows iQC to define relatively simple criteria for the appearance of different pixel types, 269  
 and extend these rules using machine-learning-driven inferences (Fig 2P1-P3), to achieve 270

high AUROC performance across VA and AGGC datasets (Fig 5).

## 5 Conclusion

Our iQC pipeline found a batch effect from a medical center that provided aged slides to scan, where the inexpensive preparation of the slides may have interacted with the adverse slide storage conditions at the medical center. Moreover, iQC provides type information for each pixel, uses pixel type information to predict surgical procedure, and provides an overall AUROC for surgical procedure prediction performance that positively corresponds to the overall quality of data produced at a medical center. iQC provides a novel stain strength statistic that corroborates the pathologist's finding that slides from this institution were faded.

We find high AUROC for all datasets and medical centers except the one medical center with aged slides. At this medical center ( $\beta$ ) AUROC is correspondingly much lower and histopathology stains are faded. Because iQC separates biopsies from nonbiopsies in mixed incoming datasets, we believe iQC may be especially valuable for downstream studies where only biopsies may be included in a study, to the exclusion of all other surgical procedures, i.e. prostatectomies, TURPs, colonic polypectomies, etc.

To our knowledge, we present the first quality control pipeline for histopathology validated to objective ground truth data, specifically surgical procedure. Following this approach, a hospital may apply our quality control pipeline and validate against surgical procedure data in their LIMS or EHR, without requiring effort or annotations from pathologists. We encourage broad adoption of such scalable quality control pipelines in digital pathology and computational pathology pipelines.

## 6 Acknowledgements

This work was funded through a Prostate Cancer Foundation grant PCFCHAL22 to MBR, BSK, IPG, and SP. Support for the GenISIS datacenter was additionally provided by the United States Veterans Administration (VA) Office of Research and Development (ORD) through SP. Authors thank Mark Hewitt and Nicholas Burns for high performance computing support. AJS thanks Dr Mariam Aly for early manuscript discussion, for The Noun Project recommendation (Sec S1.9), and for Cohen's D analysis recommendations. We are grateful to the patients who made this study possible. The content is solely the responsibility of the authors and does not necessarily represent the official views of the U.S. Department of Veterans Affairs, the Department of Defense, or the United States Government.

## 7 Contributions

Conceptualization: AJS, SP.

Data acquisition: AJS and RK (AGGC slides), AW and NK (VA slides), NW (LIMS biopsy/nonbiopsy).

Data curation: AJS, MSL.

Data transfer and management: AJS, RN, AW, NK, GT, PK, PD, NW, RK.

Methodology, software, validation, formal analysis, investigation, visualization, writing (original draft): AJS.

Funding acquisition: MBR, BSK, IPG, SP.

Project administration: AJS, MSL, RN, AW, NK, MBR, BSK, IGP, SP.

Resources (pathology) and discussion: MSL, RN, AW, NK, BSK, IPG.

Resources (computational) and discussion: GT, PK, PD, RK, SP.

Supervision (pathology): MSL, RN, IPG.

Supervision (computational): MSL, SP. 316  
Writing (editing): AJS, RN. 317  
Writing (reviewing): AJS, RN, PK, BSK, IPG, SP. 318

## 8 Ethics Declaration and Conflicts of Interest 319

The author(s) declare they have no competing interests. 320

## References 321

- [1] Thomas Fuchs and Joachim Buhmann. "Computational pathology: challenges and promises for tissue analysis." In: *Computerized medical imaging and graphics : the official journal of the Computerized Medical Imaging Society* 35.7-8 (Oct. 2011), pp. 515–530. ISSN: 1879-0771. DOI: 10.1016/j.compmedimag.2011.02.006. URL: <http://dx.doi.org/10.1016/j.compmedimag.2011.02.006>. 322-326
- [2] Sonal Kothari, John H. Phan, and May D. Wang. "Eliminating tissue-fold artifacts in histopathological whole-slide images for improved image-based prediction of cancer grade". In: *Journal of Pathology Informatics* 4.1 (Jan. 2013), p. 22. ISSN: 2153-3539. DOI: 10.4103/2153-3539.117448. URL: <https://www.sciencedirect.com/science/article/pii/S2153353922006435> (visited on 10/03/2023). 327-332
- [3] Gabriele Campanella et al. "Towards machine learned quality control: A benchmark for sharpness quantification in digital pathology". In: *Computerized Medical Imaging and Graphics. Advances in Biomedical Image Processing* 65 (Apr. 2018), pp. 142–151. ISSN: 0895-6111. DOI: 10.1016/j.compmedimag.2017.09.001. URL: <https://www.sciencedirect.com/science/article/pii/S0895611117300800> (visited on 09/12/2023). 333-338
- [4] Peter J. Schüffler et al. "Overcoming an Annotation Hurdle: Digitizing Pen Annotations from Whole Slide Images". In: *Journal of Pathology Informatics* 12.1 (Jan. 2021), p. 9. ISSN: 2153-3539. DOI: 10.4103/jpi.jpi\_85\_20. URL: <https://www.sciencedirect.com/science/article/pii/S2153353922001316> (visited on 09/12/2023). 339-343
- [5] Tomé Albuquerque et al. "Quality Control in Digital Pathology: Automatic Fragment Detection and Counting". In: *2022 44th Annual International Conference of the IEEE Engineering in Medicine & Biology Society (EMBC)*. ISSN: 2694-0604. July 2022, pp. 588–593. DOI: 10.1109/EMBC48229.2022.9871208. 344-347
- [6] Andrew Janowczyk et al. "HistoQC: An Open-Source Quality Control Tool for Digital Pathology Slides". In: *JCO Clinical Cancer Informatics* 3 (Dec. 2019). Publisher: Wolters Kluwer, pp. 1–7. DOI: 10.1200/CCI.18.00157. URL: <https://ascopubs.org/doi/full/10.1200/CCI.18.00157> (visited on 09/12/2023). 348-352
- [7] Andrew Schaumberg and Thomas Fuchs. "Identifying regions of interest from whole slide images". Provisional application filed 2019-08-24, utility patent awarded 2021-03-30. 10963673 (New York, NY). Mar. 2021. URL: <https://patentscope.wipo.int/search/en/detail.jsf?docId=W02021041338>. 353-356
- [8] Alexander I. Wright et al. "The Effect of Quality Control on Accuracy of Digital Pathology Image Analysis". In: *IEEE Journal of Biomedical and Health Informatics* 25.2 (Feb. 2021). Conference Name: IEEE Journal of Biomedical and Health Informatics, pp. 307–314. ISSN: 2168-2208. DOI: 10.1109/JBHI.2020.3046094. 357-359



- [9] Birgid Schömig-Markiefka et al. “Quality control stress test for deep learning-based diagnostic model in digital pathology”. In: *Modern Pathology* 34.12 (Dec. 2021), pp. 2098–2108. ISSN: 0893-3952. DOI: 10.1038/s41379-021-00859-x. URL: <https://www.sciencedirect.com/science/article/pii/S0893395222003702> (visited on 09/12/2023). 361-367
- [10] Frederick M. Howard et al. “The impact of site-specific digital histology signatures on deep learning model accuracy and bias”. en. In: *Nature Communications* 12.1 (July 2021). Number: 1 Publisher: Nature Publishing Group, p. 4423. ISSN: 2041-1723. DOI: 10.1038/s41467-021-24698-1. URL: <https://www.nature.com/articles/s41467-021-24698-1> (visited on 10/04/2023). 368-371
- [11] Otso Brummer et al. “Computational textural mapping harmonises sampling variation and reveals multidimensional histopathological fingerprints”. en. In: *British Journal of Cancer* 129.4 (Sept. 2023). Number: 4 Publisher: Nature Publishing Group, pp. 683–695. ISSN: 1532-1827. DOI: 10.1038/s41416-023-02329-4. URL: <https://www.nature.com/articles/s41416-023-02329-4> (visited on 10/04/2023). 372-377
- [12] Andrew Schaumberg, Mark Rubin, and Thomas Fuchs. “H&E-stained Whole Slide Deep Learning Predicts SPOP Mutation State in Prostate Cancer”. In: *bioRxiv* (July 2016), p. 064279. DOI: 10.1101/064279. URL: <http://dx.doi.org/10.1101/064279>. 378-381
- [13] Nobuyuki Otsu. “A Threshold Selection Method from Gray-Level Histograms”. In: *IEEE Transactions on Systems, Man, and Cybernetics* 9.1 (Jan. 1979). Conference Name: IEEE Transactions on Systems, Man, and Cybernetics, pp. 62–66. ISSN: 2168-2909. DOI: 10.1109/TSMC.1979.4310076. 382-385
- [14] Gabriele Campanella et al. “Clinical-grade computational pathology using weakly supervised deep learning on whole slide images”. eng. In: *Nature Medicine* 25.8 (2019), pp. 1301–1309. ISSN: 1546-170X. DOI: 10.1038/s41591-019-0508-1. 386-388
- [15] Ming Y. Lu et al. “Data-efficient and weakly supervised computational pathology on whole-slide images”. en. In: *Nature Biomedical Engineering* (Mar. 2021), pp. 1–16. ISSN: 2157-846X. DOI: 10.1038/s41551-020-00682-w. URL: <https://www.nature.com/articles/s41551-020-00682-w> (visited on 03/02/2021). 389-393
- [16] Sudhir Perincheri et al. “An independent assessment of an artificial intelligence system for prostate cancer detection shows strong diagnostic accuracy”. en. In: *Modern Pathology* 34.8 (Aug. 2021). Number: 8 Publisher: Nature Publishing Group, pp. 1588–1595. ISSN: 1530-0285. DOI: 10.1038/s41379-021-00794-x. URL: <https://www.nature.com/articles/s41379-021-00794-x> (visited on 09/14/2023). 394-399
- [17] Andrew Schaumberg et al. “DeepScope: Nonintrusive Whole Slide Saliency Annotation and Prediction from Pathologists at the Microscope”. In: Sept. 2016. ISBN: 978-3-319-67834-4. DOI: [https://doi.org/10.1007/978-3-319-67834-4\\_4](https://doi.org/10.1007/978-3-319-67834-4_4). URL: <https://www.ncbi.nlm.nih.gov/pubmed/29601065>. 400-403
- [18] Xinmi Huo et al. *Comprehensive AI Model Development for Gleason Grading: From Scanning, Cloud-Based Annotation to Pathologist-AI Interaction*. en. SSRN Scholarly Paper. Rochester, NY, July 2022. DOI: 10.2139/ssrn.4172090. URL: <https://papers.ssrn.com/abstract=4172090> (visited on 09/16/2023). 404-407

- [19] Benjamin Gompertz. "On the nature of the function expressive of the law of human mortality, and on a new mode of determining the value of life contingencies". In: *Philosophical Transactions of the Royal Society of London* 115 (Dec. 1825). Publisher: Royal Society, pp. 513–583. DOI: 10.1098/rstl.1825.0026. URL: <https://royalsocietypublishing.org/doi/10.1098/rstl.1825.0026> (visited on 09/17/2023). 408–413
- [20] Andrew Janowczyk, Patrick Leo, and Mark A Rubin. "Clinical deployment of AI for prostate cancer diagnosis". en. In: *The Lancet Digital Health* 2.8 (Aug. 2020), e383–e384. ISSN: 2589-7500. DOI: 10.1016/S2589-7500(20)30163-1. URL: <http://www.sciencedirect.com/science/article/pii/S2589750020301631> (visited on 08/03/2020). 414–418
- [21] Yijiang Chen et al. "Assessment of a computerized quantitative quality control tool for whole slide images of kidney biopsies". eng. In: *The Journal of Pathology* 253.3 (Mar. 2021), pp. 268–278. ISSN: 1096-9896. DOI: 10.1002/path.5590. 419–421
- [22] Abhijeet Patil et al. "Efficient quality control of whole slide pathology images with human-in-the-loop training". In: *Journal of Pathology Informatics* 14 (Jan. 2023), p. 100306. ISSN: 2153-3539. DOI: 10.1016/j.jpi.2023.100306. URL: <https://www.sciencedirect.com/science/article/pii/S2153353923001207> (visited on 09/15/2023). 422–426
- [23] Andrew J. Schaumberg et al. "Interpretable multimodal deep learning for real-time pan-tissue pan-disease pathology search on social media". en. In: *Modern Pathology* 33.11 (Nov. 2020), pp. 2169–2185. ISSN: 1530-0285. DOI: 10.1038/s41379-020-0540-1. URL: [https://www.nature.com/articles/s41379-020-0540-1/](https://www.nature.com/articles/s41379-020-0540-1) (visited on 08/11/2021). 427–432
- [24] Chengkuan Chen et al. "Fast and scalable search of whole-slide images via self-supervised deep learning". en. In: *Nature Biomedical Engineering* 6.12 (Dec. 2022). Number: 12 Publisher: Nature Publishing Group, pp. 1420–1434. ISSN: 2157-846X. DOI: 10.1038/s41551-022-00929-8. URL: <https://www.nature.com/articles/s41551-022-00929-8> (visited on 09/18/2023). 433–438
- [25] Charles R. Harris et al. "Array programming with NumPy". en. In: *Nature* 585.7825 (Sept. 2020). Number: 7825 Publisher: Nature Publishing Group, pp. 357–362. ISSN: 1476-4687. DOI: 10.1038/s41586-020-2649-2. URL: <https://www.nature.com/articles/s41586-020-2649-2> (visited on 09/18/2023). 439–443
- [26] Tobias Sing et al. "ROCR: visualizing classifier performance in R." In: *Bioinformatics (Oxford, England)* 21.20 (Oct. 2005), pp. 3940–3941. ISSN: 1367-4803. DOI: 10.1093/bioinformatics/bti623. URL: <http://dx.doi.org/10.1093/bioinformatics/bti623>. 444–447
- [27] Hadley Wickham. *ggplot2: Elegant Graphics for Data Analysis*. Springer-Verlag New York, 2016. URL: <https://ggplot2.tidyverse.org> (visited on 09/18/2023). 448–449
- [28] Jacob Cohen. *Statistical power analysis for the behavioral sciences*. New York, NY, USA: Academic press, 1977. ISBN: 978-1-134-74270-7. URL: <https://books.google.com/books?id=rEeOBQAAQBAJ&lpg=PP1&ots=sw0YJxPQnb&dq=cohen%20statistical%20power%20analysis%20behavioural%20sciences&lr&pg=PP1#v=onepage&q=cohen%20statistical%20power%20analysis%20behavioural%20sciences&f=false>. 450–455

- [29] Marco Torchiano. *effsize: Efficient Effect Size Computation*. 2020. DOI: 456  
10.5281/zenodo.1480624. URL: 457  
<https://CRAN.R-project.org/package=effsize>. 458
- [30] Simon Renshaw. *Immunohistochemistry: Methods Express*. en. Scion Publishing Ltd, 459  
Dec. 2006. ISBN: 978-1-907904-41-7. URL: 460  
[https://books.google.com/books?id=H-F9EAAAQBAJ&lpg=PA45&ots=WuQ- 461  
fBpSxR&lr&pg=PA45#v=onepage&q&f=false](https://books.google.com/books?id=H-F9EAAAQBAJ&lpg=PA45&ots=WuQ-fBpSxR&lr&pg=PA45#v=onepage&q&f=false). 462
- [31] Adam Goode and Mahadev Satyanarayanan. *A Vendor-Neutral Library and Viewer for 463  
Whole-Slide Images*. June 2008. URL: [http://reports- 465  
archive.adm.cs.cmu.edu/anon/2008/abstracts/08-136.html](http://reports- 464<br/>archive.adm.cs.cmu.edu/anon/2008/abstracts/08-136.html).
- [32] Adam Goode et al. "OpenSlide: A Vendor-Neutral Software Foundation for Digital 466  
Pathology". In: *Journal of Pathology Informatics* 4.1 (2013), p. 27. DOI: 467  
<https://doi.org/10.4103/2153-3539.119005>. URL: [https: 468  
://www.sciencedirect.com/science/article/pii/S2153353922006484](https://www.sciencedirect.com/science/article/pii/S2153353922006484). 469
- [33] Evelyn Fix and Joseph L. Hodges. "Discriminatory Analysis. Nonparametric 470  
Discrimination: Consistency Properties". en. In: *USAF School of Aviation Medicine 471  
ADA800276.5028-110633* (1951), pp. 1–24. URL: 472  
<https://apps.dtic.mil/dtic/tr/fulltext/u2/a800276.pdf>. 473
- [34] T Cover and P Hart. "Nearest neighbor pattern classification". In: *IEEE Transactions 474  
on Information Theory* 13.1 (Jan. 1967), pp. 21–27. ISSN: 0018-9448. DOI: 475  
10.1109/tit.1967.1053964. URL: 476  
<http://dx.doi.org/10.1109/tit.1967.1053964>. 477
- [35] Irwin Sobel and Gary Feldman. *A 3x3 Isotropic Gradient Operator for Image 478  
Processing*. en. Invited talk. 1968. 479
- [36] Irwin Sobel. "An Isotropic 3x3 Image Gradient Operator". In: *Presentation at 480  
Stanford A.I. Project 1968* (Feb. 2014). URL: [https://www.researchgate.net/ 481  
publication/239398674\\_An\\_Isotropic\\_3\\_3\\_Image\\_Gradient\\_Operator](https://www.researchgate.net/publication/239398674_An_Isotropic_3_3_Image_Gradient_Operator). 482

## Supporting Information

### S1 Supplementary materials and methods

#### S1.1 iQC quality control categories

iQC defines ten quality control categories (Fig 3). This provides granular information for the quality of a slide. These categories are grouped into “fail...”, “review...”, and “pass...” supercategories. We define each of the ten categories below.

1. fail\_all\_tissue: iQC suggests all tissue in the slide is not suitable for any diagnostic purpose. The tissue is not suitable for a pathologist to render a diagnosis. The tissue is also not suitable for downstream computational analysis / machine learning / artificial intelligence (AI). Typically, this occurs because the tissue staining is badly faded (Sec S1.2.7.1), e.g. the hematoxylin stain is not visible and only eosin remains. This fading worsens as the slide ages, depending on the storage conditions, the quality of stains used, and perhaps other factors (Sec S1.6).
2. fail\_some\_tissue: iQC suggests some of the tissue is not suitable for any diagnostic purpose. This typically occurs if the mounting solution/layer that adheres the glass coverslip to the glass slide has aged (Sec S1.6). The mounting solution may break down to form acrylamide, leading to “window pane breaking” artifacts and bubbles. If these artifacts or bubbles occur over tissue in the slide, such occluded tissue may not be suitable for a pathologist or AI. These regions should be excluded, while the rest of the unaffected tissue may be retained and used by a pathologist or AI. It may be especially problematic if such artifacts or bubbles occlude all the malignant foci in the slide, or other foci of disease. Such occlusion may change the diagnosis, depending on whether or not disease foci are included or excluded. For this reason, great care should be taken when using fail\_some\_tissue slides.
3. review\_for\_inadequate\_tissue: iQC suggests there is very little tissue in the slide. This slide should be manually reviewed by an expert to determine if sufficient tissue exists for either a pathologist to diagnose a disease or an AI to analyze.
4. review\_for\_acrylamide\_aging: iQC suggests there may be evidence of acrylamide aging in the slide, e.g. window pane breaking artifacts or bubbles. The evidence is not strong, so manual expert review is recommended.
5. review\_for\_systematic\_blur: iQC suggests there may be evidence of a specific type of blur in the slide, which we call systematic blur. Systematic blur is thought to occur when the acrylamide layer has aged such that the glass coverslip is not securely adhered to the glass slide, so the slide “shakes in place” while the slide is being scanned, and this shaking is such that the scanner’s autofocus cannot focus correctly on the slide to get a sharp picture. The result is a band of blurred pixels, e.g. a horizontal band of blurring as the scanner’s camera travels left to right to photograph parts of the slide. Systematic blur induces subtle linear artifacts in the background between adjacent passes of the scanner’s camera, which may occur when the scanner’s software stitches together images. iQC detects these linear artifacts as straight lines of “suspect” pixels. If the number of such linear suspect pixels exceeds a threshold, iQC recommends the slide for manual expert review here. This may be a novel way to detect blur, in that we look at lines in the slide background, rather than directly look for blurry pixels.
6. review\_for\_faded\_stain: iQC suggests there may be evidence of stain fading in the slide, but this evidence is not strong, so manual expert review is recommended.

7. review\_for\_debris\_pen\_etc: iQC suggests there may be evidence for debris, pen, or marker in the slide. Manual expert review is recommended. Some care should be taken with these slides, e.g. if pen marks occlude foci of disease, omitting such foci may change the diagnosis. 529-532
8. review\_for\_barcode\_writing\_pii\_etc: iQC introduces a potentially novel method to detect barcodes or other black structured marks (like text) on a slide. Slides with names printed on them in black text are not de-identified and are not suitable for research purposes. Often, however, the printed text in a slide indicates where the slide was manufactured, rather than indicating PHI/PII of the patient. Manual expert review is recommended. 533-538
9. pass\_intact: iQC suggests the slide is generally good condition, though there may be some small amount of pen, marker, or debris present in the slide. Automated tools such as iQC may recommend where pen, marker, etc are in the slide so these may be avoided. iQC recommends the slide is otherwise of high quality and is expected to be suitable for both a pathologist and AI. 539-543
10. pass\_pristine: iQC suggests the entire slide is high quality and can likely be used as-is. 544

## S1.2 iQC algorithm steps 545

iQC has a number of steps outlined below. iQC operates on the whole slide image at 10x total magnification and assumes a scan at 0.25 microns per pixel. 546-547

### S1.2.1 Otsu thresholds 548

iQC calculates thresholds via Otsu's Method[13]. Thresholds are calculated for the red channel, green channel, blue channel, grayscale pixel values, and Sobel magnitude values. For machine learning, a pixel is represented by a 4-dimensional red, green, blue, and Sobel vector of values (Sec S1.8). 549-552

### S1.2.2 Preliminary pixel typing 553

iQC uses simple rules to assign a preliminary type to each pixel, where the types are hematoxylin type, red type, green type, blue type, background type, black type, and tissue type. The red/green/blue/black types are often pen or marker. The black types may also be debris, tissue folds, or necrosis. The hematoxylin type is a special subtype of the tissue type. Hematoxylin types have a blue channel value greater than red channel value, a red greater than green, and a Sobel value above the corresponding Otsu threshold (Sec S1.2.1). 554-559

### S1.2.3 Debris detection 560

If a set of nonbackground pixels are completely enclosed in box with sides of length  $2r$ , then the enclosed nonbackground pixels are typed as debris. iQC lets  $r = 10$ , e.g. the debris box radius is 10. 561-563

### S1.2.4 Edge detection 564

When slide mounting solution or mounting tape (Fig 1B2a,b) ages, "window pane breaking" artifacts and acrylamide bubbles may form. Both these signs have well-defined edges. iQC detects edges to both describe the whole slide image and estimate the presence of these signs of age. iQC excludes debris from edge detection. By excluding debris, the count of edge pixels may be more accurate, so by extension the statistics from the calculation of how 565-569



many pixels are edges related to window pane breaking or bubbles may be more accurate. 570  
iQC uses of Otsu's Method to type a pixel as an edge or not. 571

### S1.2.5 Systematic blur detection via bar artifacts 572

Horizontal bars of suspect pixels may indicate systematic blur (Fig 2A3,B3). In principle, 573  
there could be vertical bars as well, depending on how the scanner scans, either left to right 574  
(horizontal) or top to bottom (vertical). 575

### S1.2.6 Black mark detection 576

iQC next converts "suspect" type pixels to "black" type pixels according to grayscale Otsu 577  
Thresholds. 578

### S1.2.7 Pen detection, connection, and extension 579

For every red, green, blue, or black "pen" type pixel – iQC attempts to make straight lines 580  
connecting two pen pixels having the same type (e.g. red pixel may connect to a red pixel, 581  
blue pixel may connect to a blue pixel, etc), then flood fill through suspect pixels that are 582  
not stitching artifacts. The extent of flood fill is limited to a specific distance away from 583  
where the flood fill started, which prevents flood fill from overwriting large portions of imask 584  
with pen pixel types. 585

iQC counts tissue and suspect pixels, replacing tissue pixels with pen if tissue pixel is 586  
surrounded by pen or background. This is intended to remove any false tissue type pixel 587  
perimeter from pen marks. 588

#### S1.2.7.1 Stain strength calculation 589

iQC calculates stain strength in two ways, mean stain strength (Eqn S4) and median stain 590  
strength (Eqn S8). If most of the tissue is stroma, then the mean or median pixel is 591  
expected to approximate the red, green, and blue pixel values of stroma in the slide. If 592  
 $stain\_strength_{mean}$  is less than  $stain\_strength_{mean\_threshold}$ , or  $stain\_strength_{median}$  is 593  
less than  $stain\_strength_{median\_threshold}$ , iQC categories the slide as "fail\_all\_tissue" due to 594  
faded stain. Presently,  $stain\_strength_{mean\_threshold} = 6$  and 595  
 $stain\_strength_{median\_threshold} = 6$ . 596

$$red_{mean} = \frac{1}{length(tissue\_pixels)} \sum_{pixel\ p \in tissue\_pixels} red(p) \quad (S1) \quad 597$$

$$green_{mean} = \frac{1}{length(tissue\_pixels)} \sum_{pixel\ p \in tissue\_pixels} green(p) \quad (S2) \quad 598$$

$$blue_{mean} = \frac{1}{length(tissue\_pixels)} \sum_{pixel\ p \in tissue\_pixels} blue(p) \quad (S3) \quad 599$$

$$stain\_strength_{mean} = \frac{red_{mean} + blue_{mean}}{2} - green_{mean} \quad (S4) \quad 600$$

$$red_{median} = median(\{pixel\ p \in tissue\_pixels : red(p)\}) \quad (S5) \quad 601$$

$$green_{median} = median(\{pixel\ p \in tissue\_pixels : green(p)\}) \quad (S6) \quad 602$$

$$blue_{median} = median(\{pixel\ p \in tissue\_pixels : blue(p)\}) \quad (S7) \quad 603$$

$$stain\_strength_{median} = \frac{red_{median} + blue_{median}}{2} - green_{median} \quad (S8)$$

For  $median(\dots)$  we use the grouped median rather than simple median, because there are so many duplicate values in a channel for an image, e.g.  $red(p)$  values are integers between 0 and 255 inclusive. We found this median approach to be better behaved than the mean, e.g. via the median there is no significant difference in stain strength between AGGC biopsies and AGGC nonbiopsies, which we believe is an important negative control (Fig 6).

### S1.2.7.2 Systematic blur threshold

iQC calculates how sharp (i.e. not blurry) the tissue pixels are. This sharpness is defined by a Sobel Magnitude. This sharpness should not be confused with systematic blur. Tissue is visually sharp when tissue pixels tend to have different grayscale values when compared to adjacent pixels. A freshly-stained slide will tend to be more vibrantly-stained and more "sharp" than an aged slide, as fresh stains will highlight differences among tissues well.

iQC estimates a slide may have evidence of systematic blur if the total number of suspect pixels that participate in horizontal or vertical bars exceeds double the height or width of the slide image at 10x. This may be used as a warning to that the slide may benefit from manual review to check for systematic blur.

### S1.2.7.3 Slide age estimates

iQC estimates slide age as a stain strength metric multiplied by a tissue sharpness metric. The intuition for this is aged slides with faded stain will have both (1) low stain strength because stain has faded to gray, and (2) low tissue sharpness because old stain does not vibrantly highlight differences among adjacent tissues. The intuition continues that for new freshly-stained slides there will have both (1) high stain strength because reds (from eosin) and blues (from hematoxylin) will be much stronger than greens (neither hematoxylin or eosin is green) in the slide and (2) high tissue sharpness because fresh stain will vibrantly highlight differences among adjacent tissues.

### S1.2.8 Write $i_{mask_{raw}}$

iQC writes  $i_{mask_{raw}}$  as a semantic segmentation of pixel types in the whole slide image.

### S1.2.9 Stitching score for systematic blur bar artifacts

iQC detects if stitching artifacts run left-right (horizontally) or up-down (vertically). The blur boundary will be parallel to stitching artifacts, if there is a blur boundary. For example, if there are horizontal stitching artifacts, there will also be horizontal bands of systematic blur.

### S1.2.10 Write $i_{mask_{mean}}$

iQC writes a mean image that is a mix of the pixel types with the original pixel values in the slide image.

### S1.2.11 KNN inference of suspect pixels to other types

Not all pixels fit within iQC's rigid set of rules for background, pen, tissue, etc (per Sec S1.2.2). Many pixels may be typed as "suspect" in the slide to indicate these pixels may be tissue, but the pixels may also be background, pen, etc. To infer the type of suspect pixels, iQC uses the K-Nearest Neighbors (KNN) machine learning algorithm for pixels (Sec S1.8). Specifically, for a given suspect pixel  $p$ , iQC uses KNN to find the pixel  $c$ , where  $c$  has the most similar red, green, blue, and Sobel magnitude values to  $p$ . This is sometimes referred to as the "closest pair of points problem". Then iQC assigns the  $i_{mask_{raw}}$  type of  $c$

to  $p$ . Thus  $p$  is no longer the suspect type. Instead, the type of  $p$  is equal to the type of  $c$ . This is the inductive bias of KNN, e.g. that the type of a pixel is mostly likely the same as the type of the most similar pixel. This is a very simple inductive bias that is readily interpretable. KNN may be considered the simplest possible machine learning algorithm, so KNN is a logical first choice of machine learning algorithms, by Occam's Razor. The performance and relative complexity of more advanced machine learning algorithms may then be compared to KNN.

#### **S1.2.12 Write $i_{mask_{inferred}}$**

iQC writes  $i_{mask_{inferred}}$  file that includes inferred pixel types.

#### **S1.2.13 Biopsy/nonbiopsy prediction**

See Surgical procedure prediction (biopsy/nonbiopsy) (Sec S1.4).

#### **S1.2.14 Ridge detection**

A ridge identifies window breaking patterns or bubbles. For iQC's purposes, a ridge is a pixel with an edge type in  $i_{mask_{raw}}$ . This is a dark/black pixel that has adjacent lighter/background pixels and nearby non-adjacent lighter/background pixels. We consider a Sobel filter to identify edges, and an Otsu on the Sobel magnitudes to classify a pixel type as edge/non-edge. For iQC, an edge pixel is grown outwards to adjacent edge pixels, such that all involved edge pixels are types as ridges. This allows edge pixels that would not themselves be considered ridges to take the ridge type. Canonically in image analysis, a ridge is a contiguous path of edge pixels.

##### **S1.2.14.1 Acrylamide age statistics, a.k.a. slide degeneration**

To estimate how aged the slide is, iQC combines ridge detection (edges of bubbles) with stain strength detection (faded stain).

#### **S1.2.15 Write $i_{mask_{edge}}$**

iQC writes  $i_{mask_{edge}}$  to debug edge and ridge detection. This highlights bubble edges, tissue edges, pen edges, etc (Fig 2C2).

#### **S1.2.16 Barcode and PHI/PII detection**

Part of the mission at our Center is to make research-ready datasets. It is required that there are no identifiers in research-ready datasets. Identifiers may include PHI/PII as well as medical accession numbers, surgical pathology numbers, etc (Sec 2I1-2).

Therefore, iQC performs barcode detection, which may detect other identifiers printed on a slide as plain text (Sec 2J1-2, K1-2). Barcode detection compares how many dark/black pixels are set against light/background pixels, on both the left and right sides of a slide. If there is a sticker or some printed black text that may disclose identifiers, this text is expected to be on the left side or the right side, but never both sides at the same time. This printed text may be on a black-and-white sticker. Thus, by comparing the dark/light differences on the left to right sides, identifiers such as PHI/PII are most likely to be disclosed when one side has many more dark-against-light pixels than the other side.

#### **S1.2.17 Close-out timing statistics**

iQC times its performance, for monitoring purposes. These times are reported as iQC completes.

### S1.3 Lambda operator for contiguity measurements

We define an operator lambda to measure contiguity of pixel types, e.g. how long is an approximately continuous line of tissue type pixels. Some breaks in this line are allowed, but generally the longer the break the lower the score from the lambda operator will be.

### S1.4 Surgical procedure prediction (biopsy/nonbiopsy)

In Equation 1,  $G_{narrow}$  converts to a number between 0 and 100 the approximate measurement of the narrowest region of tissue (Eqn S9), with the intuition that biopsies are narrow and will be close to 0:

$$G_{narrow}(i_{m_i}) = 100e^{-100e^{-0.025 * mmts}} \quad (S9)$$

$G_{area}$  converts to a number between 0 and 100 the approximate measurement of the tissue area by summing up the number of tissue type pixels, with the intuition that biopsies tend to involve little tissue and will be close to 0:

$$G_{area}(i_{m_i}) = 100e^{-50e^{-0.000004 * (sthp + stnpi)}} \quad (S10)$$

$G_{long}$  converts to a number between 0 and 100 the approximate length-to-width ratio of the tissue, with the intuition that biopsies tend to have a ratio much greater than 1 (so  $G_{long}$  will be close to 0) while nonbiopsies tend to have a ratio close to 1 (so  $G_{long}$  will be close to 1):

$$G_{long}(i_{m_i}) = 100 - 100e^{-100e^{-2.5 * mmctsr}} \quad (S11)$$

$G_{adipose}$  is a correction factor for specimens with an abundance of adipose tissue, to prevent some ectomy/TURP samples that are mostly fat from erroneously being predicted as biopsies (Eqn S12).  $G_{adipose}$  converts to a number between 0 and 100000 the approximate measure of how frequently tissue type pixels are adjacent to background type pixels. Background pixels are white/clear/empty in the slide image. Adipose (a.k.a. fat) tissue typically consists of thin strips of stromal tissue to support large globules of fat tissue. The stromal tissue is pink and is counted as tissue pixels, while the fat globules are clear and are counted as background. Therefore in fat, tissue pixels are adjacent to many more background pixels that would occur in a biopsy or in solid blocks of tissue (in most ectomies or TURPs). Fatty ectomies have a high  $G_{adipose}$ , which is important because fatty ectomies may have very little solid tissue, or only a thin strip of tissue that would otherwise be classified as a biopsy (e.g. Fig 4B1), if it were not for  $G_{adipose}$  increasing  $y(i_{m_i})$  (Eqn 1).

$$G_{adipose}(i_{m_i}) = 100000e^{-20e^{-10 * batr}} \quad (S12)$$

We define  $mmts$  (Eqn S9) as the “min median tissue score”. Low values of  $mmts$  mean the narrowest region is very small, so the tissue may be thin, so  $G_{narrow}(i_{m_i})$  approaches 0, to suggest a biopsy. In contrast, high values of  $mmts$  mean the narrowest region is much larger, so the tissue is approximately square in shape,  $G_{narrow}(i_{m_i})$  approaches 100, to suggest a nonbiopsy.

In Equation S10, we define  $sthp$  as the “sum [of] tissue or hematoxylin pixels” and  $stnpi$  as “suspect-to-nonsuspect pixels inferred”.

We define  $mmctsr$  (Eqn S11) as “maxmin max contiguous tissue score ratio”. Low values of  $mmctsr$  mean the ratio is close to 1 and the tissue is approximately square so  $G_{long}(i_{m_i})$  approaches 100, to suggest a nonbiopsy. In contrast, high values of  $mmctsr$  mean the ratio may be larger than 1 (e.g. a ratio of 20) and the tissue is approximately ribbon-like so  $G_{long}(i_{m_i})$  approaches 0, to suggest a biopsy.

In Equation S12, we define  $batr$  as the “background-to-adjacent-tissue ratio”.

## S1.5 Computational software and hardware

We implemented iQC in python 3.9.16, with imports from numpy[25] and statistics. Visualization was performed in R version 4.2.2 and rstudio 2022.07.2-576, with plots made via ROCR[26] and ggplot2[27]. Cohen's D calculation[28] and interpretation of D values as negligible( $d < 0.2$ )/small( $d < 0.5$ )/medium( $d < 0.8$ )/large( $d \geq 0.8$ ) was performed with R's effsize package[29]. Text processing was performed in perl 5.32.1.

For computation, we leveraged the Genomic Information System for Integrative Science (GenISIS) datacenter at the Center for Data and Computational Sciences. iQC can run on a single-CPU system with an amount of CPU RAM approximately triple the file size, e.g. for a 1GB whole slide image, we suggest 3GB CPU RAM. We recommend running iQC on at least 5 CPUs in parallel, ideally 20 CPUs, and 80+ CPUs for best performance. The amount of required CPU RAM scales with the number of parallel CPUs.

For comparisons to iQC, we considered HistoQC[6] at commit version a99916c2ceaa61c7ae5d75600f10d3fb553041fc from March 22, 2023. We used HistoQC's default configuration file, i.e. config.ini.

## S1.6 Glass microscopy slide preparation

Institution  $\alpha$ 's pathology lab prepared glass microscopy slides with Acrymount Plus (StatLab Medical Products, McKinney, TX), a Toluene and Acrylate polymer based mounting media. This reagent is formulated to reduce oxidation, discoloration (i.e. yellowing) and fading in H&E stains over time. This may be superior in quality and integrity to the more traditional Xylene-based mounting media.

The proper mounting media plays a critical role in embedding the specimen as well as providing an optically translucent barrier that preserves the pathological tissue section quality and integrity for long-term storage. Furthermore, a high-quality mounting media will have a refractive index that is virtually identical to the glass slide. This may be optimal for high quality images and high magnification[30].

Leakage around slides is usually attributed to usage of excessive amount of mounting media or low-quality ingredients within the media that may degrade over time and form byproducts, e.g. acrylamide bubbles.

## S1.7 Whole slide images

VAMC glass microscopy slides were scanned on a Leica Aperio GT450 scanner, which produces SVS files that we read via openslide 3.4.1[31, 32]. AGGC slides were scanned on an Akoya Biosciences scanner, which produces TIFF files that we read via ImageMagick 6.

## S1.8 Machine learning

iQC uses machine learning to infer select "suspect" pixel types to other pixel types. Specifically, for a given image, iQC uses the K-nearest neighbors algorithm[33, 34], with  $k=1$  and an L1 norm. A pixel is represented as a four-dimensional value: red channel (0 to 255 integer), green channel, blue channel, and Sobel channel. The Sobel channel is the magnitude of a  $3 \times 3$  Sobel operator[35, 36].

## S1.9 Workflow icons attribution

For Figure 1, we leverage a number of icons from The Noun Project<sup>1</sup> (Table S1).

<sup>1</sup>The Noun Project may be reached at <https://thenounproject.com>



| Panel | Source                                                                                                                            | Creator                                                                                                 | Note                                   |
|-------|-----------------------------------------------------------------------------------------------------------------------------------|---------------------------------------------------------------------------------------------------------|----------------------------------------|
| A1    | <a href="https://thenounproject.com/icon/surgery-4701438/">https://thenounproject.com/icon/surgery-4701438/</a>                   | <a href="https://thenounproject.com/smalllike/">https://thenounproject.com/smalllike/</a>               | Surgery                                |
| A2a   | <a href="https://thenounproject.com/icon/biopsy-4331608/">https://thenounproject.com/icon/biopsy-4331608/</a>                     | <a href="https://thenounproject.com/loritas/">https://thenounproject.com/loritas/</a>                   | Needle biopsy                          |
| A2b   | <a href="https://thenounproject.com/icon/scalpel-6182858/">https://thenounproject.com/icon/scalpel-6182858/</a>                   | <a href="https://thenounproject.com/maxim221/">https://thenounproject.com/maxim221/</a>                 | Nonbiopsy                              |
| B1a   | <a href="https://thenounproject.com/icon/lab-technician-3924681/">https://thenounproject.com/icon/lab-technician-3924681/</a>     | <a href="https://thenounproject.com/wanny4/">https://thenounproject.com/wanny4/</a>                     | Pathologists' assistant                |
| B1b   | <a href="https://thenounproject.com/icon/robot-1065525/">https://thenounproject.com/icon/robot-1065525/</a>                       | <a href="https://thenounproject.com/vectorsmarket/">https://thenounproject.com/vectorsmarket/</a>       | Robot/automation                       |
| B2a   | <a href="https://thenounproject.com/icon/specimen-3839739/">https://thenounproject.com/icon/specimen-3839739/</a>                 | <a href="https://thenounproject.com/eucalyp/">https://thenounproject.com/eucalyp/</a>                   | Slide w/ mounting solution             |
| B2b   | n/a                                                                                                                               | n/a                                                                                                     | Slide w/ mounting tape <sup>1</sup>    |
| B3    | <a href="https://thenounproject.com/icon/drawer-open-76232/">https://thenounproject.com/icon/drawer-open-76232/</a>               | <a href="https://thenounproject.com/bravo/">https://thenounproject.com/bravo/</a>                       | Cabinet                                |
| B3    | <a href="https://thenounproject.com/icon/heat-wave-5901166/">https://thenounproject.com/icon/heat-wave-5901166/</a>               | <a href="https://thenounproject.com/zhendysikoembang/">https://thenounproject.com/zhendysikoembang/</a> | Sun and heat                           |
| B4    | <a href="https://thenounproject.com/icon/shipping-5125536/">https://thenounproject.com/icon/shipping-5125536/</a>                 | <a href="https://thenounproject.com/lareadesign/">https://thenounproject.com/lareadesign/</a>           | Shipping truck                         |
| B5    | <a href="https://thenounproject.com/icon/slide-scanner-5674441/">https://thenounproject.com/icon/slide-scanner-5674441/</a>       | <a href="https://thenounproject.com/dandyri11a/">https://thenounproject.com/dandyri11a/</a>             | Aperio GT450 scanner                   |
| C1    | <a href="https://thenounproject.com/icon/hospital-1228358/">https://thenounproject.com/icon/hospital-1228358/</a>                 | <a href="https://thenounproject.com/atifarshad/">https://thenounproject.com/atifarshad/</a>             | Hospital / medical center <sup>2</sup> |
| C2a   | n/a                                                                                                                               | n/a                                                                                                     | Slides, own work.                      |
| C2b   | n/a                                                                                                                               | n/a                                                                                                     | Slides, own work.                      |
| D1a   | <a href="https://thenounproject.com/icon/castle-1153240/">https://thenounproject.com/icon/castle-1153240/</a>                     | <a href="https://thenounproject.com/creaticca/">https://thenounproject.com/creaticca/</a>               | Data staging area <sup>2</sup>         |
| D1b   | <a href="https://thenounproject.com/icon/ehr-6121728/">https://thenounproject.com/icon/ehr-6121728/</a>                           | <a href="https://thenounproject.com/jnishime/">https://thenounproject.com/jnishime/</a>                 | LIMS/EHR <sup>2</sup>                  |
| D2a   | <a href="https://thenounproject.com/icon/quality-2569075/">https://thenounproject.com/icon/quality-2569075/</a>                   | <a href="https://thenounproject.com/gemdesigns/">https://thenounproject.com/gemdesigns/</a>             | iQC and its statistics <sup>3</sup>    |
| D2b   | n/a                                                                                                                               | n/a                                                                                                     | iQC mask, own work.                    |
| D2c   | n/a                                                                                                                               | n/a                                                                                                     | iQC mask, own work.                    |
| D3    | <a href="https://thenounproject.com/icon/machine-learning-5852293/">https://thenounproject.com/icon/machine-learning-5852293/</a> | <a href="https://thenounproject.com/warhammer/">https://thenounproject.com/warhammer/</a>               | Computational analyses <sup>2</sup>    |
| D4    | <a href="https://thenounproject.com/icon/publication-4594256/">https://thenounproject.com/icon/publication-4594256/</a>           | <a href="https://thenounproject.com/liarastudio/">https://thenounproject.com/liarastudio/</a>           | Publication / results <sup>2</sup>     |

**Table S1.** Attribution of icons in Figure 1 panels. Icons are distributed under a Creative Commons Attribution 3.0 license <https://creativecommons.org/licenses/by/3.0/>. Legend: <sup>1</sup> is own/AJS work, derived from B2a. <sup>2</sup> color is own/AJS work. <sup>3</sup> text, color, and background are own/AJS work.
